# Supplementary material for: Preparation of REE-doped NaY(WO4)2 single crystals for quantitative determination of rare earth elements in REE:NaY(WO4)2 laser crystals by LA-ICP-MS
Source: Royal Society of Chemistry journal article supplement (doi:10.1039/d2ay01247b), 2022-01-01
Supplement: d2ay01247b1.pdf [file d2ay01247b1.pdf]

## Electronic Supplementary Information

*Of*

### **Preparation of REE-doped NaY(WO<sub>4</sub>)<sub>2</sub> single crystals for quantitative determination of rare earth elements in REE:NaY(WO<sub>4</sub>)<sub>2</sub> laser crystals by LA-ICP-MS**

Yu Zhang,<sup>a</sup> Yijian Sun,<sup>a,d</sup> Jianzong Zhou,<sup>e</sup> Jian Yang,<sup>a</sup> Jun Deng,<sup>a</sup> Jianfeng Shao,<sup>a</sup> Tengfei Zheng,<sup>c</sup> Yuqiu Ke,<sup>a,c,\*</sup> and Tao Long<sup>b,\*</sup>

<sup>a</sup> Jiangxi Provincial Key Laboratory of Functional Molecular Materials Chemistry, School of Chemistry and Chemical Engineering, Jiangxi University of Science and Technology, Ganzhou 341000, P.R. China

<sup>b</sup> Hubei Key Laboratory of Processing and Application of Catalytic materials, Huanggang Normal University, Huanggang 438000, P.R. China

<sup>c</sup> Key Laboratory of Testing and Tracing of Rare Earth Products for State Market Regulation, Jiangxi University of Science and Technology, Ganzhou 341000, P.R. China

<sup>d</sup> National Rare Earth Functional Material Innovation Center, Ganzhou 341000, P. R. China

<sup>e</sup> State Key Laboratory of Biogeology and Environmental Geology, School of Earth Sciences, China University of Geosciences, Wuhan 430074, P. R. China

Table S1 Quantitative statistics of elemental fractionation index after internal standardization

| Internal standard | La    | Ce    | Pr    | Nd    | Sm    | Eu    | Gd    | Tb    | Dy    | Ho    | Er    | Tm    | Yb    | Lu    |
|-------------------|-------|-------|-------|-------|-------|-------|-------|-------|-------|-------|-------|-------|-------|-------|
| <sup>89</sup> Y   | 1.006 | 1.010 | 1.007 | 1.005 | 1.006 | 1.010 | 1.004 | 1.005 | 1.005 | 1.009 | 1.005 | 1.003 | 1.003 | 1.004 |
| <sup>180</sup> W  | 0.967 | 0.971 | 0.968 | 0.966 | 0.967 | 0.971 | 0.965 | 0.966 | 0.966 | 0.970 | 0.966 | 0.964 | 0.965 | 0.966 |

Table S2 Elemental fractionation index of REEs obtained under different laser ablation spot sizes

| Spot size ( $\mu\text{m}$ ) | La   | Ce   | Pr   | Nd   | Sm   | Eu   | Gd   | Tb   | Dy   | Ho   | Er   | Tm   | Yb   | Lu   |
|-----------------------------|------|------|------|------|------|------|------|------|------|------|------|------|------|------|
| 5                           | 1.89 | 2.29 | 2.00 | 1.92 | 1.70 | 1.85 | 1.43 | 1.34 | 1.33 | 1.29 | 1.19 | 1.25 | 1.16 | 1.08 |
| 10                          | 1.13 | 1.20 | 1.13 | 1.09 | 1.09 | 1.15 | 1.05 | 1.01 | 1.04 | 1.02 | 1.01 | 1.03 | 1.03 | 1.00 |
| 16                          | 1.04 | 1.02 | 0.91 | 1.04 | 1.04 | 1.01 | 1.02 | 0.89 | 1.01 | 0.86 | 1.01 | 0.86 | 1.01 | 0.92 |
| 24                          | 0.87 | 1.03 | 1.03 | 1.04 | 1.03 | 1.04 | 1.02 | 1.02 | 0.96 | 1.01 | 0.93 | 1.01 | 1.01 | 1.01 |
| 32                          | 1.02 | 1.03 | 1.02 | 0.96 | 0.96 | 1.03 | 0.92 | 1.02 | 1.01 | 1.02 | 1.02 | 1.01 | 0.95 | 1.01 |
| 44                          | 1.02 | 1.04 | 1.02 | 1.01 | 1.01 | 1.02 | 1.01 | 1.01 | 1.01 | 1.01 | 1.01 | 1.01 | 1.01 | 1.01 |
| 60                          | 1.01 | 1.01 | 1.01 | 1.00 | 1.01 | 1.01 | 1.00 | 1.01 | 1.01 | 1.01 | 1.01 | 1.00 | 1.00 | 1.00 |
| 90                          | 1.00 | 1.00 | 1.00 | 1.00 | 1.00 | 1.00 | 1.00 | 1.00 | 1.00 | 1.00 | 1.00 | 1.00 | 1.00 | 1.01 |
| 120                         | 1.00 | 1.00 | 1.00 | 1.00 | 1.00 | 1.00 | 1.00 | 1.00 | 1.00 | 1.00 | 1.01 | 1.00 | 1.00 | 1.01 |
| 160                         | 1.00 | 1.00 | 1.00 | 1.00 | 1.00 | 1.00 | 1.00 | 1.00 | 1.00 | 1.01 | 1.01 | 1.01 | 1.00 | 1.01 |

Table S3 Elemental fractionation index of REEs obtained under different laser ablation repetition rates

| Repetition rate (Hz) | La   | Ce   | Pr   | Nd   | Sm   | Eu   | Gd   | Tb   | Dy   | Ho   | Er   | Tm   | Yb   | Lu   |
|----------------------|------|------|------|------|------|------|------|------|------|------|------|------|------|------|
| 4                    | 1.01 | 1.01 | 1.01 | 1.01 | 1.01 | 1.01 | 1.00 | 1.00 | 1.00 | 1.00 | 1.00 | 1.00 | 1.00 | 1.00 |
| 6                    | 1.00 | 1.01 | 1.01 | 1.00 | 1.00 | 1.01 | 1.00 | 1.00 | 1.00 | 1.00 | 1.00 | 1.00 | 0.99 | 1.00 |
| 8                    | 1.01 | 1.01 | 1.01 | 1.01 | 1.00 | 1.01 | 1.00 | 1.00 | 1.00 | 1.00 | 1.00 | 1.00 | 1.00 | 1.00 |
| 10                   | 1.01 | 1.01 | 1.01 | 1.01 | 1.00 | 1.01 | 1.01 | 1.00 | 1.00 | 1.00 | 1.00 | 1.01 | 1.00 | 1.00 |
| 12                   | 1.00 | 1.00 | 1.00 | 1.00 | 1.00 | 1.01 | 1.00 | 1.00 | 1.00 | 1.00 | 1.00 | 0.99 | 1.00 | 1.00 |
